# Supplementary material for: Innate and adaptive nasal mucosal immune responses following experimental human pneumococcal colonization
Source: JCI journal article supplement (doi:10.1172/jci128865), 2019-07-30
Supplement: sd1 [file 1]

Supplementary Table 1. List of antibodies used for CyTOF.

| #  | Label             | Specificity    | Clone     | Provider  | Catalogue     |
|----|-------------------|----------------|-----------|-----------|---------------|
| 1  | <sup>89</sup> Y   | CD45           | HI30      | Fluidigm  | 3089003B      |
| 2  | <sup>115</sup> La | CD5            | UCHT2     | BioLegend | 300627        |
| 3  | <sup>141</sup> Pr | CD196 (CCR6)   | G034E3    | Fluidigm  | 3141003A      |
| 4  | <sup>142</sup> Nd | CD19           | HIB19     | Fluidigm  | 3142001B      |
| 5  | <sup>143</sup> Nd | CD117 (c-Kit)  | 104D2     | Fluidigm  | 3143001B      |
| 6  | <sup>144</sup> Nd | CD66b          | REA306    | Miltenyi  | 130-108-019   |
| 7  | <sup>145</sup> Nd | CD4            | RPA-T4    | Fluidigm  | 3145001B      |
| 8  | <sup>146</sup> Nd | CD8a           | RPA-T8    | Fluidigm  | 3146001B      |
| 9  | <sup>148</sup> Nd | CD14           | M5E2      | BioLegend | 301843        |
| 10 | <sup>149</sup> Sm | CD25 (IL-2Ra)  | 2A3       | BioLegend | 301843        |
| 11 | <sup>150</sup> Nd | CD185 (CXCR5)  | J252D4    | BioLegend | 356902        |
| 12 | <sup>151</sup> Eu | CD123          | 6H6       | Fluidigm  | 3151001B      |
| 13 | <sup>152</sup> Sm | TCRγδ          | 11F2      | Fluidigm  | 3152008B      |
| 14 | <sup>153</sup> Eu | CD7            | CD7-6B7   | Fluidigm  | 3153014B      |
| 15 | <sup>154</sup> Sm | CD163          | GHI/61    | Fluidigm  | 3154007B      |
| 16 | <sup>155</sup> Gd | CD69           | FN50      | BioLegend | 310939        |
| 17 | <sup>156</sup> Gd | CD294 (CRTH2)  | BM16      | BioLegend | 350102        |
| 18 | <sup>158</sup> Gd | CD209          | 9E9A8     | BioLegend | 330102        |
| 19 | <sup>159</sup> Tb | CD197 (CCR7)   | G043H7    | Fluidigm  | 3159003A      |
| 20 | <sup>161</sup> Dy | KLRG1 (MAFA)   | REA261    | Miltenyi  | Special order |
| 21 | <sup>162</sup> Dy | CD11c          | Bu15      | Fluidigm  | 3162005B      |
| 22 | <sup>163</sup> Dy | CD152 (CTLA-4) | BNI3      | BioLegend | 369602        |
| 23 | <sup>164</sup> Dy | CD161          | HP-3G10   | Fluidigm  | 3164009B      |
| 24 | <sup>165</sup> Ho | CD127 (IL-7Ra) | AO19D5    | Fluidigm  | 3165008B      |
| 25 | <sup>166</sup> Er | CD141          | AD5-14H12 | Miltenyi  | 130-108-033   |
| 26 | <sup>167</sup> Er | CD27           | O323      | Fluidigm  | 3167002B      |
| 27 | <sup>168</sup> Er | HLA-DR         | L243      | BioLegend | 307651        |
| 28 | <sup>169</sup> Tm | CD45RA         | HI100     | Fluidigm  | 3169008B      |
| 29 | <sup>170</sup> Er | CD3            | UCHT1     | Fluidigm  | 3170001B      |
| 30 | <sup>171</sup> Yb | CD206          | 15-2      | BioLegend | 321127        |
| 31 | <sup>172</sup> Yb | CD38           | HIT2      | Fluidigm  | 3172007B      |
| 32 | <sup>173</sup> Yb | CD45RO         | UCHL1     | BioLegend | 304239        |
| 33 | <sup>174</sup> Yb | CD335 (NKp46)  | 92E       | BioLegend | 331902        |
| 34 | <sup>175</sup> Lu | CD193 (CCR3)   | 5E8       | Fluidigm  | 3175025B      |
| 35 | <sup>176</sup> Yb | CD56           | NCAM16.2  | Fluidigm  | 3176008B      |
| 36 | <sup>194</sup> Pt | Epcam          | 9C4       | BioLegend | 324229        |
| 37 | <sup>198</sup> Pt | CD86           | IT2.2     | BioLegend | 305435        |
| 38 | <sup>209</sup> Bi | CD16           | 3G8       | Fluidigm  | 3209002B      |

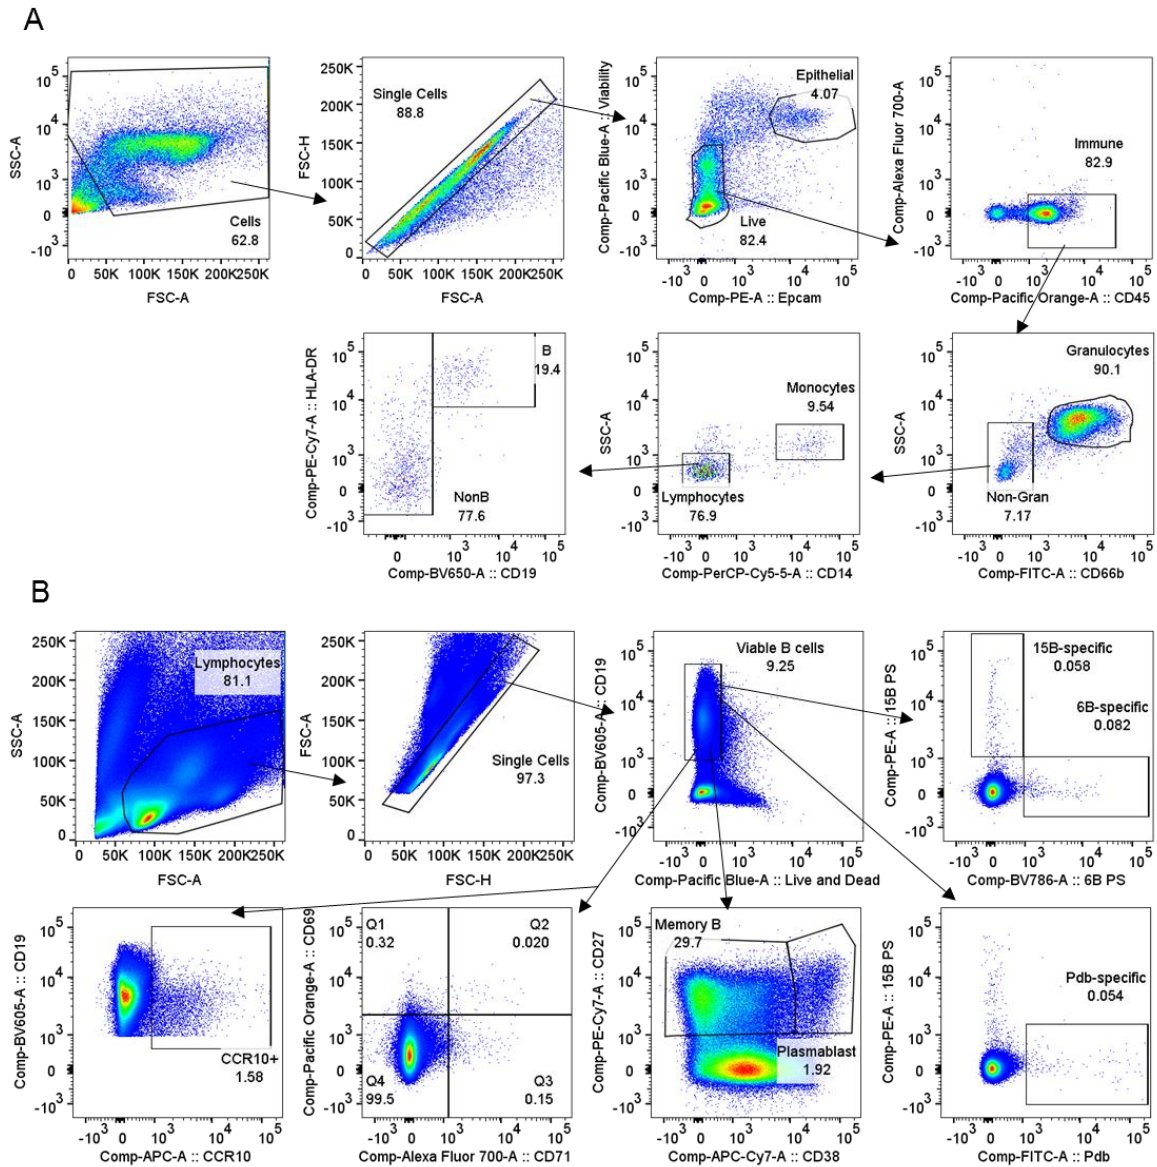

Supplementary Figure 1. B cell validation flow cytometry gating strategies. A) Gating strategy for nasal CD19<sup>+</sup> B cells for a representative nasal curette sample. Each plot shows the cells contained in the precedent gate. Population names and frequencies are shown. B) Gating strategy for the detection of pneumococcus-specific B cells. Each plot shows the cells contained in the precedent gate. Population and frequency are shown. Gates were set on all B cells and copied into Spn-specific populations.

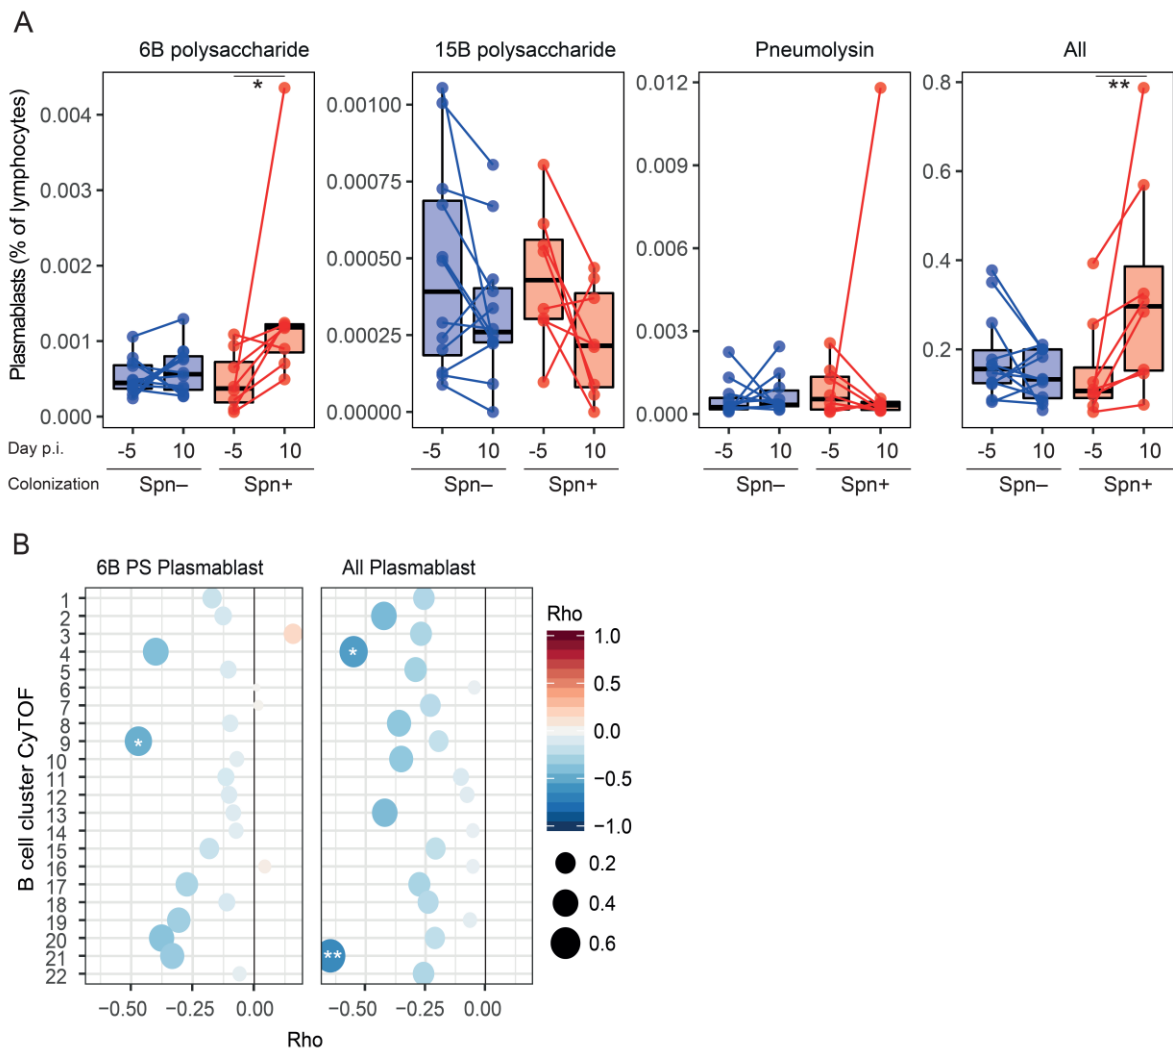

Supplementary Figure 2. Normalization of circulating plasmablasts to total lymphocyte numbers. A) Levels of 6B polysaccharide-specific, 15B polysaccharide-specific, Pneumolysin derivative b (Pneumolysin)-specific or all plasmablast amongst total lymphocytes were measured from PBMC collected at baseline (Day -5) and at the time of biopsy (Day 10 post inoculation). Boxplots and individual subjects are depicted with carriage- in blue (n=12) and carriage+ in red (n=8), with paired samples connected by dashed lines. \*  $p < 0.05$ , \*\*  $p < 0.01$  by Wilcoxon test comparing a group to its baseline. B) Correlations between fold-change in levels of 6B PS-specific and total plasmablasts between baseline and day 10 normalized against total number of lymphocytes against levels of B cell clusters measured by CyTOF. Color and size of symbols reflect the Spearman rho value. \*  $p < 0.05$  and \*\*  $p < 0.01$  by Spearman test.

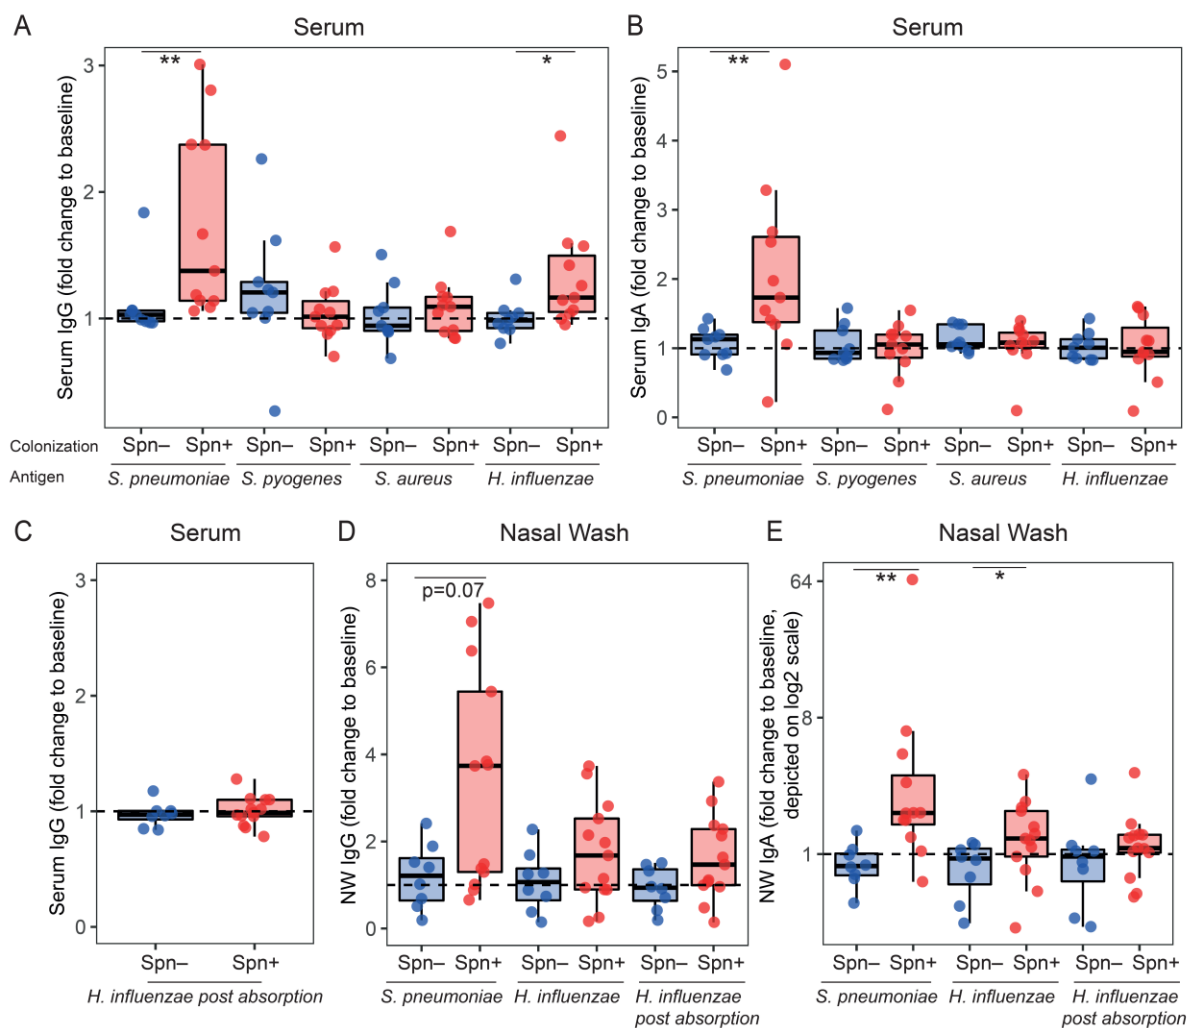

Supplementary Figure 3. Antibody levels against respiratory pathogens. Fold change (day 23 post inoculation versus baseline) in serum levels of A) IgG and B) IgA against *Streptococcus pneumoniae*, *Streptococcus pyogenes*, *Staphylococcus aureus* and *Haemophilus influenzae*. C) Fold change of serum levels of *Haemophilus influenzae*-specific IgG post absorption with Spn. Nasal wash (NW) levels of D) IgG and E) IgA against *Streptococcus pneumoniae* and *Haemophilus influenzae* (with or without pre-absorption with Spn). Boxplots and individual subjects are depicted with carriage<sup>-</sup> in blue (Spn<sup>-</sup>, n=8-9) and carriage<sup>+</sup> in red (Spn<sup>+</sup>, n=11-13). \*  $p < 0.05$ , \*\*  $p < 0.01$  by Mann-Whitney test comparing fold-change levels between carriage<sup>-</sup> and carriage<sup>+</sup> subjects.

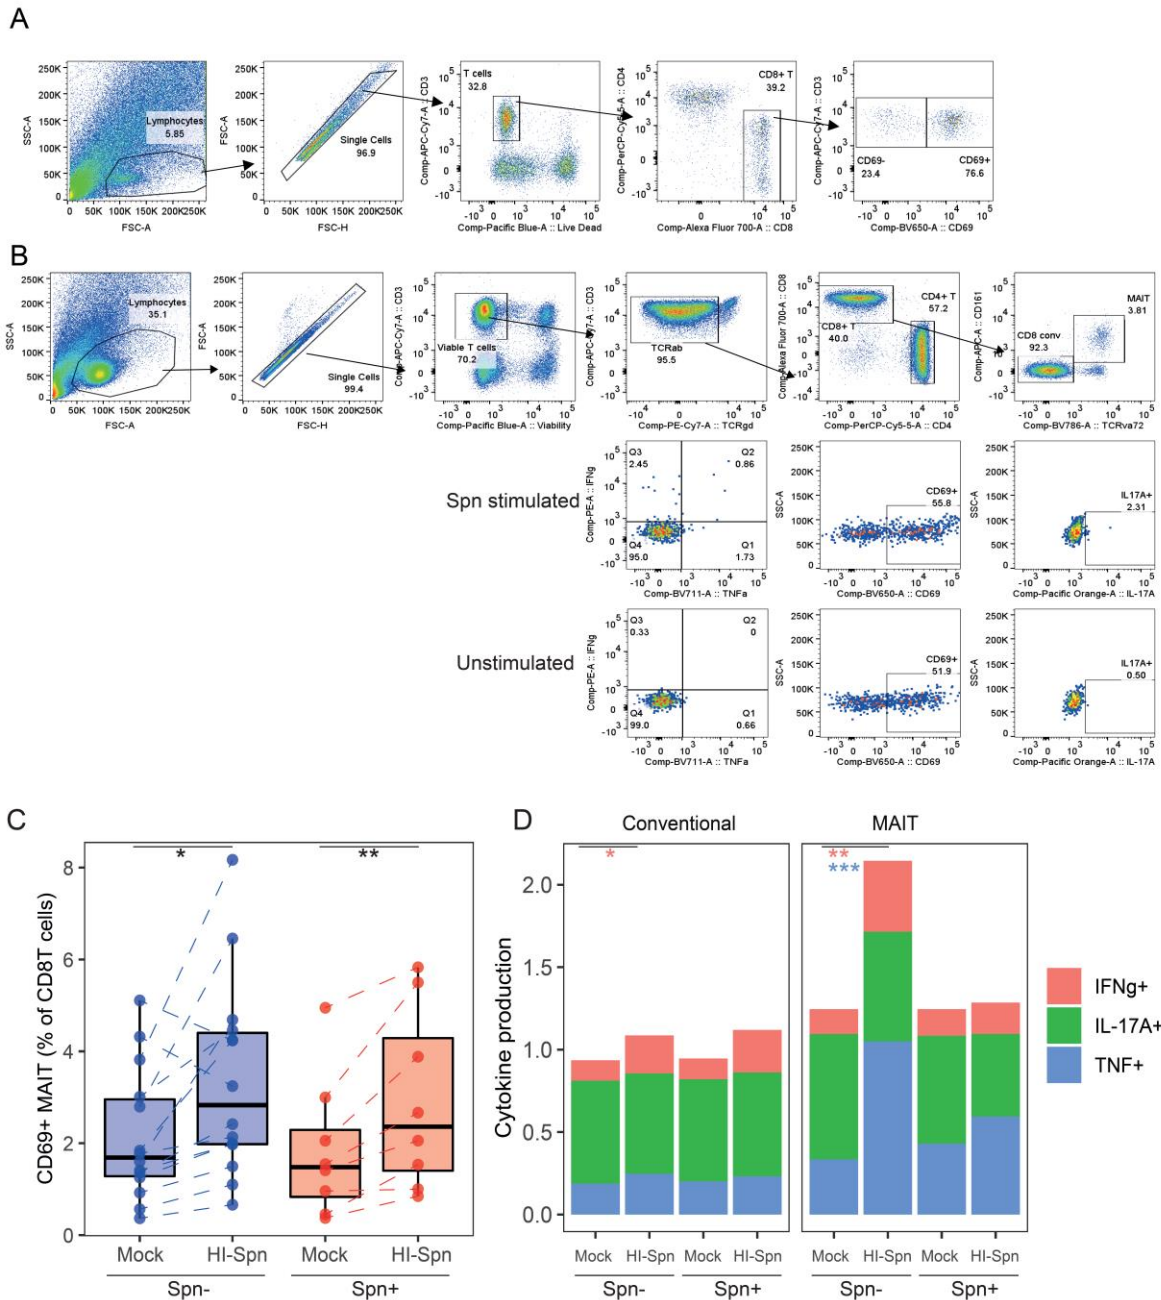

Supplementary Figure 4. CD8<sup>+</sup> T cell flow cytometry gating strategies. A) Gating strategy for CD8<sup>+</sup> T tissue-resident memory cells by flow cytometry for a representative nasal biopsy. Each plot shows the cells contained in the precedent gate. Population and frequency are shown. B) Gating strategy to detect CD8<sup>+</sup> mucosal associated invariant T cells in PBMC. One representative heat-inactivated pneumococcus (HI-Spn)-stimulated sample is depicted. For cytokine production and CD69 activation large dots are used to better show rare events. Each plot shows the cells contained in the precedent gate. Population and frequency are shown. C) Levels of CD69 on MAIT cells after stimulation or not. Individuals are shown and connected by lines and boxplots are overlaid. D) Stacked bar charts showing the median level of cytokine

production (IFN- $\gamma$  in red, IL-17A in green and TNF in blue) for conventional and MAIT CD8+ T cells. \* $p < 0.05$ , \*\* $p < 0.01$ , \*\*\* $p < 0.001$  by Wilcoxon test.

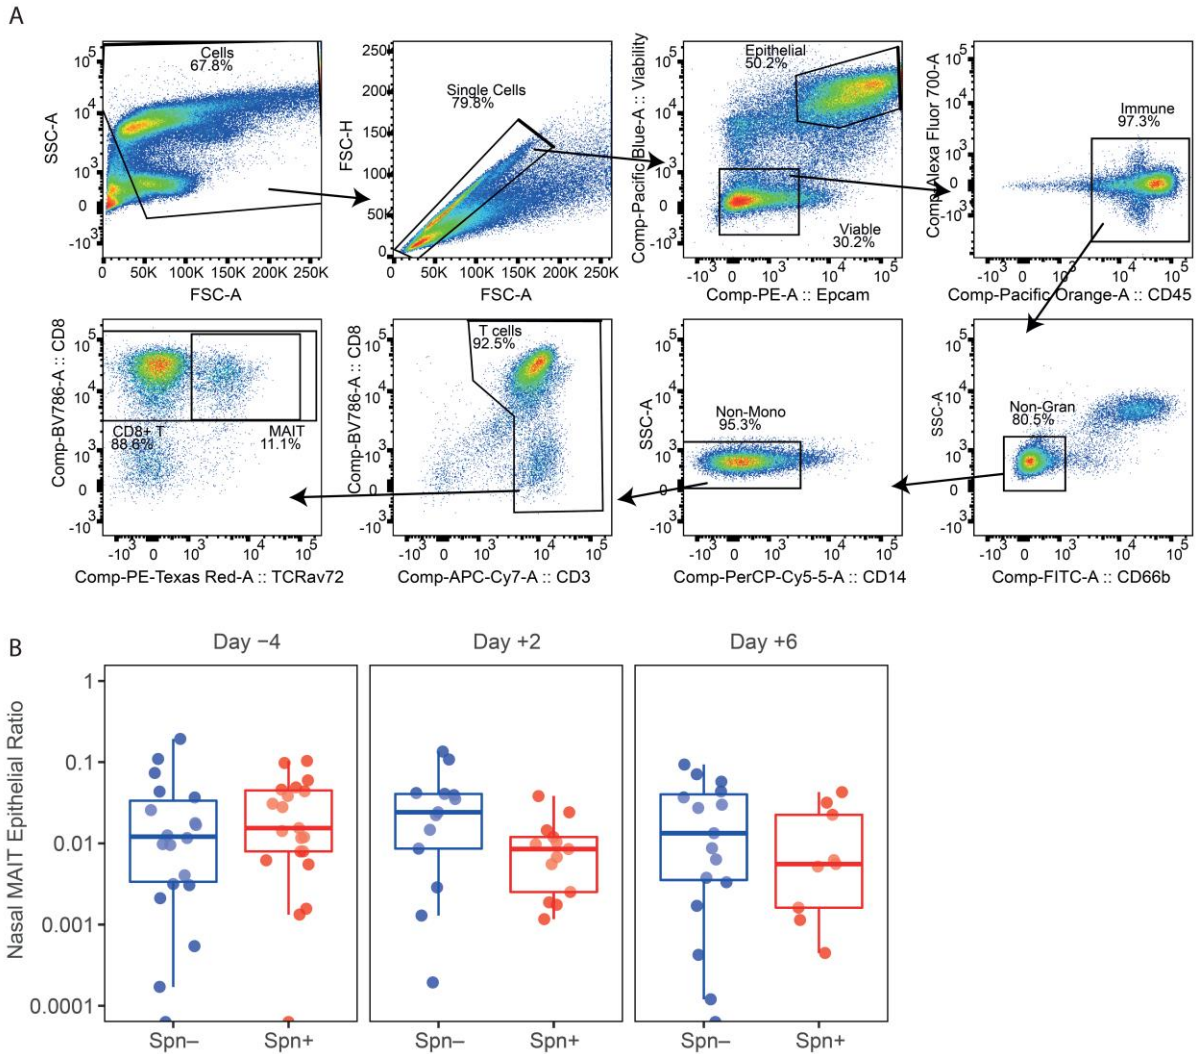

Supplementary Figure 5. Nasal CD8<sup>+</sup> mucosal associated invariant T cell measured longitudinally following pneumococcal challenge. A) Gating strategy for a representative nasal curette sample is shown. Each plot shows the cells contained in the precedent gate. Population and frequency are shown. B) Boxplots and individual subjects are depicted prior to Spn challenge and at days 2 and 6 post challenge. Spn<sup>-</sup> subjects are depicted in blue (n=19) and Spn<sup>+</sup> subjects in red (n=20).

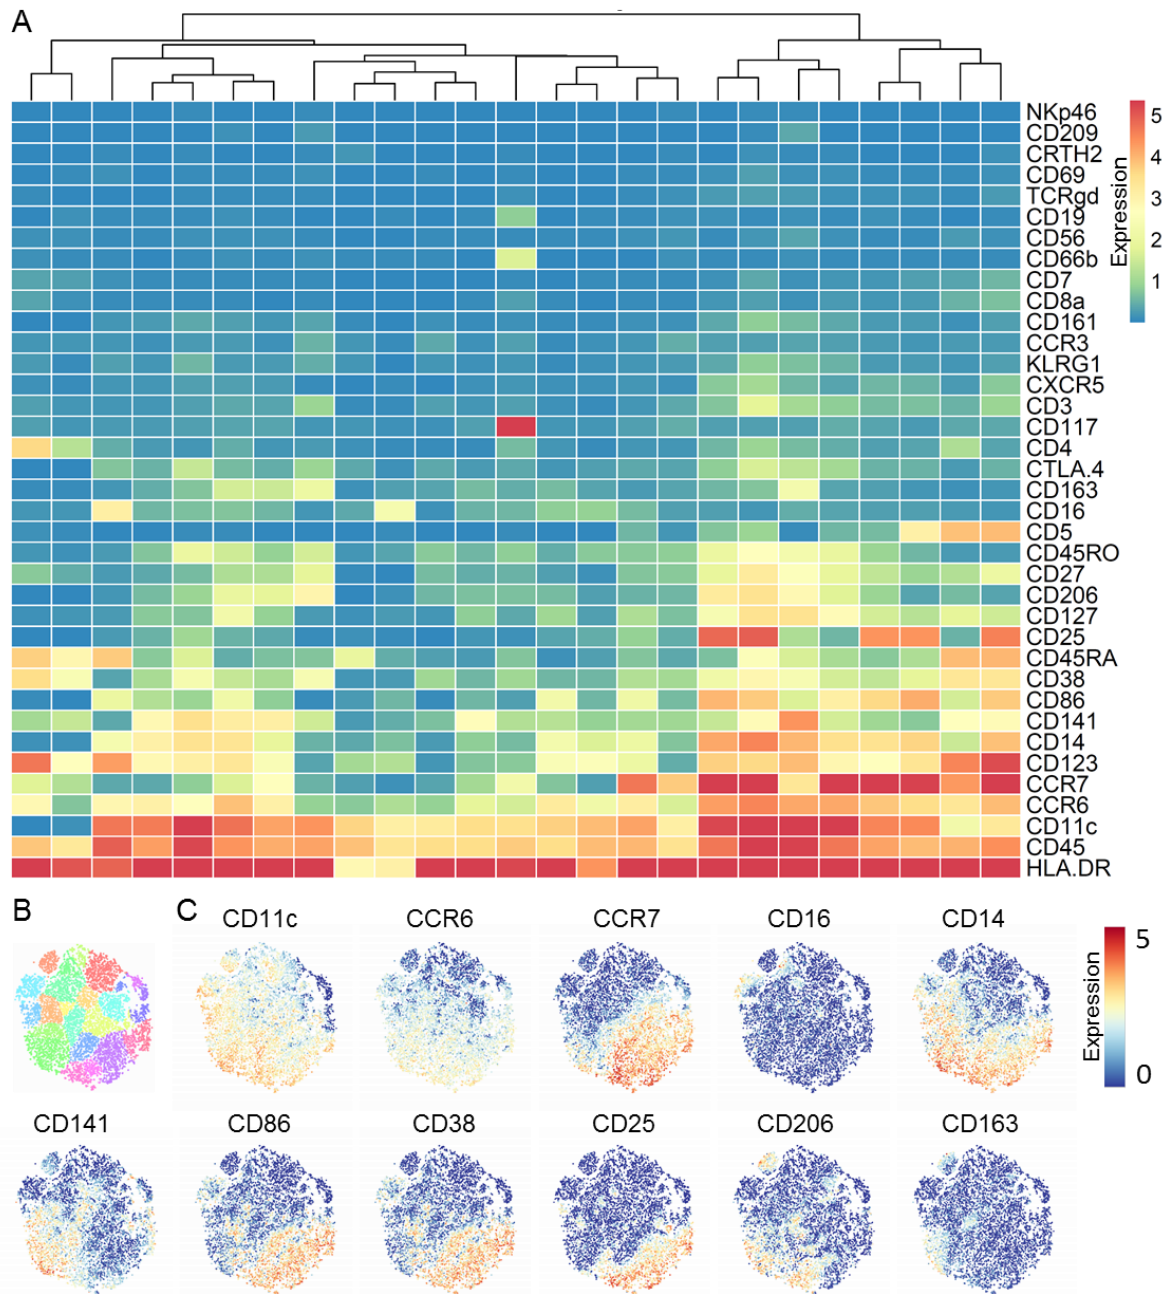

Supplementary Figure 6. Nasal monocytes/macrophages are predominantly CD14<sup>+</sup> CD16<sup>-</sup> classical monocytes. A) Heatmap showing for each of the monocyte clusters (columns) the expression for thirty-seven markers (rows). Markers are ordered by increasing median expression. Columns are re-ordered and a cluster dendrogram is shown. B) Cluster definition within the myeloid cell lineage. C) Fingerprint graphs showing expression for selected markers on a single-cell level.



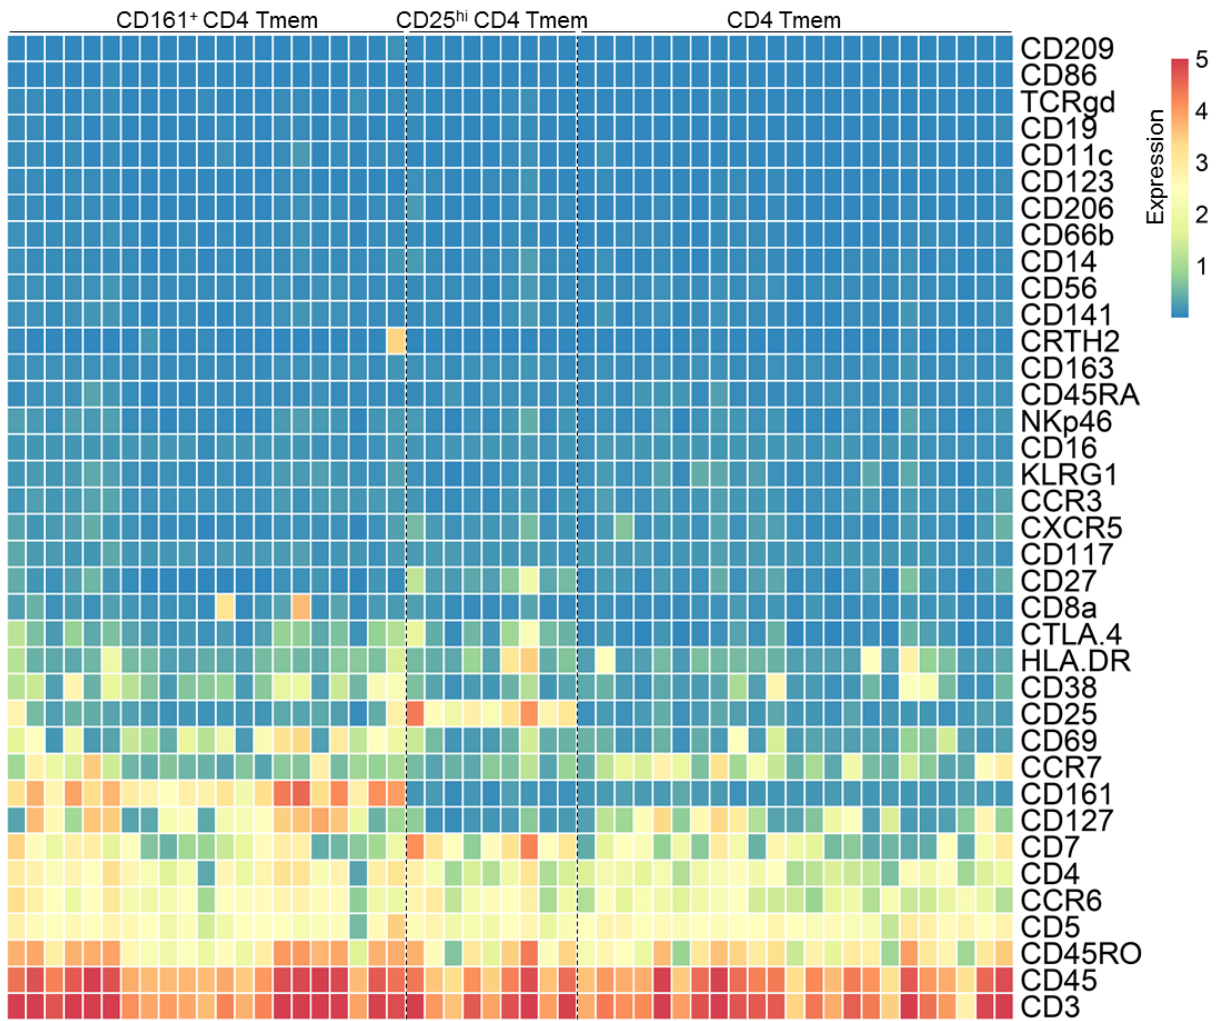

Supplementary Figure 7. Nasal memory CD4 T cell phenotype. Heatmap including each of the three memory (CD45RO+) CD4+ T cell subpopulations within the CD4+ T cell lineage. All identified clusters (columns) with expression for thirty-seven markers (rows) are shown. Clusters belonging to the CD161<sup>+</sup>, CD25<sup>hi</sup> and CD4 T memory (Tmem) subpopulations are separated by dashed lines. Markers are ordered by increasing median expression.

Supplementary Table 2. List of antibodies used for flow cytometry

| <b>#</b> | <b>Fluorochrome</b> | <b>Specificity</b> | <b>Clone</b> | <b>Provider</b> | <b>Catalogue</b> |
|----------|---------------------|--------------------|--------------|-----------------|------------------|
| 1        | PE/TxsRed           | TCRVa7.2           | 3C10         | Biolegend       | 351730           |
| 2        | PerCP/Cy5.5         | CD14               | MφP9         | BD Biosciences  | 562692           |
| 3        | BV650               | CD19               | HIB19        | Biolegend       | 302238           |
| 4        | APC/Cy7             | CD3                | SK7          | Biolegend       | 344818           |
| 5        | BV510               | CD45               | HI30         | Biolegend       | 304036           |
| 6        | PacificOrange       | CD45               | HI30         | Thermofisher    | MHCD-4530        |
| 7        | PECy7               | HLADR              | L243         | Biolegend       | 307616           |
| 8        | PE                  | EpCAM              | 9C4          | Biolegend       | 324206           |
| 9        | BV785               | CD8                | SK1          | Biolegend       | 344740           |
| 10       | FITC                | CD66b              | G10F5        | Biolegend       | 305104           |
| 11       | BV711               | TCRVa7.2           | 3C10         | Biolegend       | 351732           |
| 12       | APC                 | CD161              | HP-3G10      | Biolegend       | 339912           |
| 13       | BV650               | CD69               | FN50         | Biolegend       | 310934           |
| 14       | PE/Dazzle594        | CD25               | M-A251       | Biolegend       | 356126           |
| 15       | BV605               | CD103              | Ber-ACT8     | Biolegend       | 350218           |
| 16       | PerCP/Cy5.5         | CD45               | HI30         | Biolegend       | 304028           |
| 17       | AF700               | CD8                | SK1          | Biolegend       | 344724           |
| 18       | BV785               | TCRVa7.2           | 3C10         | Biolegend       | 351722           |
| 19       | APC/H7              | CD3                | SK7          | BD Biosciences  | 560176           |
| 20       | PE/Cy7              | TCRgd              | 11F2         | BD Biosciences  | 655410           |
| 21       | AF488               | FOXP3              | 259D         | Biolegend       | 320212           |
| 22       | PE                  | IFNγ               | 4S.B3        | Biolegend       | 502509           |
| 23       | BV711               | TNFα               | MAb11        | Biolegend       | 502940           |
| 24       | BV510               | IL17a              | N49-653      | BD Biosciences  | 563295           |
| 25       | AF700               | CD71               | M-A712       | BD Biosciences  | 563769           |
| 26       | BV605               | CD19               | SJ25C1       | BD Biosciences  | 562653           |
| 27       | PE/Cy7              | CD27               | M-T271       | BD Biosciences  | 560609           |
| 28       | APC/Cy7             | CD38               | HIT2         | Biolegend       | 303534           |
| 29       | BV510               | CD69               | FN50         | Biolegend       | 310936           |
| 30       | APC                 | CCR10              | 1B5          | BD Biosciences  | 564771           |
| 31       | PE/TxsRed           | TCRVa7.2           | 3C10         | Biolegend       | 351730           |

Supplementary Table 3. List of antibodies used for immunohistochemistry.

| <b>#</b>  | <b>Antibody</b> | <b>Specificity</b> | <b>Clone</b> | <b>Provider</b>  | <b>Catalogue</b> |
|-----------|-----------------|--------------------|--------------|------------------|------------------|
| <b>1</b>  | Primary         | CD3                | F7.2.38      | Dako             | M7254            |
| <b>2</b>  | Primary         | CD4                | EPR6855      | Abcam            | ab133616         |
| <b>3</b>  | Primary         | CD20               | EP459Y       | Abcam            | ab78237          |
| <b>4</b>  | Primary         | CD66b              | polyclonal   | Abcam            | ab214175         |
| <b>5</b>  | Primary         | CD68               | EPR20545     | Abcam            | ab213363         |
| <b>6</b>  | Primary         | CD11b              | EP1345Y      | Abcam            | ab52478          |
| <b>7</b>  | Primary         | CD8                | EP1150Y      | Epitomics        | 1872-1           |
| <b>8</b>  | Primary         | CD161              | polyclonal   | Atlas antibodies | HPA039113        |
| <b>9</b>  | Peroxidase      | a-rabbit           |              | Vector labs      | PI-1000          |
| <b>10</b> | Peroxidase      | a-mouse            |              | Vector labs      | MP-7452          |
